# Supplementary material
Source: publisher figshare collection journal article supplement (https://acs.figshare.com/ndownloader/files/4321876)
Supplement: Supplementary file 1 [file 4321876]

data_General
_audit_creation_date                  '2010-10-17'
_audit_creation_method                'by CrystalStructure 3.8'
_audit_update_record                   
;
?

2010-10-18 # Formatted by publCIF
;


#==============================================================================

# PROCESSING SUMMARY (IUCr Office Use Only)

_journal_date_recd_electronic     ?
_journal_date_from_coeditor       ?
_journal_date_accepted            ?
_journal_coeditor_code            ?

#==============================================================================

# SUBMISSION DETAILS

_publ_contact_author_name             'Biao Zhou'
_publ_contact_author_email            'zhou@chs.nihon-u.ac.jp'
_publ_contact_author_fax              '+81-3-5317-9433'
_publ_contact_author_phone            '+81-3-5317-9680'
_publ_contact_author_address
;
Department of Chemistry
College of Humanities and Sciences
Nihon University
Sakurajosui 3-25-40 Setagaya-Ku
Tokyo 156-8550, JAPAN
;
_publ_requested_journal               'ENTER JOURNAL NAME HERE'
_publ_requested_category              'CHOOSE FI FM FO CI CM CO or AD'
_publ_requested_coeditor_name          ?

#==============================================================================

# TITLE AND AUTHOR LIST

_publ_section_title
;
ENTER SECTION TITLE
;
_publ_section_title_footnote
;
 ENTER FOOTNOTE TO TITLE OF PAPER
;
loop_
_publ_author_name
_publ_author_footnote
_publ_author_address
' FIRST AUTHORS NAME '
;
  FIRST AUTHORS FOOTNOTES
;
;
  FIRST AUTHORS ADDRESS
;
_publ_section_synopsis
;
ENTER SYNOPSIS
;

#==============================================================================

# TEXT

_publ_section_abstract
;
ENTER ABSTRACT
;
_publ_section_comment
;
ENTER TEXT
;
_publ_section_references
;
ENTER OTHER REFERENCES

Rigaku Americas and Rigaku Corporation. (2007). <i>CrystalStructure</i>
(Version 3.8). Single Crystal Structure Analysis Software. Rigaku Americas,
9009 TX, USA 77381-5209. Rigaku, Tokyo 196-8666, Japan.

Altomare, A., Cascarano, G., Giacovazzo, C., Guagliardi, A., Burla, M.,
Polidori, G. & Camalli, M. (1994). J. Appl. Cryst., 27, 435. <i>SIR92</i>

Sheldrick, G. M. (1997). <i>SHELXL97</i>. University of Gottingen, Germany.
;
_publ_section_figure_captions
;


ENTER FIGURE CAPTIONS
;
_publ_section_exptl_prep
;
ENTER COMPOUND PREPARATION DETAILS
;
_publ_section_exptl_refinement
;
ENTER SPECIAL DETAILS OF THE REFINEMENT
;

#==============================================================================

data___20100514-Nd-00B-F


_diffrn_reflns_theta_min   3
#Added by publCIF

_diffrn_ambient_pressure   100
#Added by publCIF

_diffrn_ambient_temperature   273
#Added by publCIF


#==============================================================================

# CHEMICAL DATA

_chemical_formula_sum                  'C24 H48 Cu3 N6 Nd2 O33 '
_chemical_formula_moiety               'C24 H48 Cu3 N6 Nd2 O33 '
_chemical_formula_weight               1427.78
_chemical_melting_point                ?

#==============================================================================

# CRYSTAL DATA
_symmetry_cell_setting                 trigonal
_symmetry_space_group_name_H-M        'P -3 c 1'
_symmetry_space_group_name_Hall       '-P 3 2"c'
_symmetry_Int_Tables_number            165
loop_
_symmetry_equiv_pos_site_id
_symmetry_equiv_pos_as_xyz
1   '+X,+Y,+Z'
2   '-Y,+X-Y,+Z'
3   '-X+Y,-X,+Z'
4   '-X+Y,+Y,1/2+Z'
5   '+X,+X-Y,1/2+Z'
6   '-Y,-X,1/2+Z'
7   '-X,-Y,-Z'
8   '+Y,-X+Y,-Z'
9   '+X-Y,+X,-Z'
10  '+X-Y,-Y,1/2-Z'
11  '-X,-X+Y,1/2-Z'
12  '+Y,+X,1/2-Z'

#------------------------------------------------------------------------------

_cell_length_a                         13.4567(16)
_cell_length_b                         13.4567(16)
_cell_length_c                         14.6982(19)
_cell_angle_alpha                      90.0000
_cell_angle_beta                       90.0000
_cell_angle_gamma                      120.0000
_cell_volume                           2305.0(5)
_cell_formula_units_Z                  2
_cell_measurement_reflns_used          7725
_cell_measurement_theta_min            3.3
_cell_measurement_theta_max            27.5
_cell_measurement_temperature          273.1

#------------------------------------------------------------------------------

_exptl_crystal_description            'block'
_exptl_crystal_colour                 'blue'
_exptl_crystal_size_max                0.20
_exptl_crystal_size_mid                0.20
_exptl_crystal_size_min                0.20
_exptl_crystal_density_diffrn          2.057
_exptl_crystal_density_meas            ?
_exptl_crystal_density_method         'not measured'
_exptl_crystal_F_000                   1410.00
_exptl_absorpt_coefficient_mu          3.681
_exptl_absorpt_correction_type         multi-scan
_exptl_absorpt_process_details         
'Jacobson, R. (1998) Private communication'
_exptl_absorpt_correction_T_min        0.338
_exptl_absorpt_correction_T_max        0.479

#==============================================================================

# EXPERIMENTAL DATA

_diffrn_radiation_type                'Mo K\a'
_diffrn_radiation_wavelength           0.71070
_diffrn_measurement_device_type       'Rigaku Mercury'
_diffrn_measurement_method             \w
_diffrn_detector_area_resol_mean       7.31
_diffrn_reflns_number                  34790
_diffrn_reflns_av_R_equivalents        0.034
_diffrn_reflns_theta_max               27.46
_diffrn_measured_fraction_theta_max    1.000
_diffrn_reflns_theta_full              27.46
_diffrn_measured_fraction_theta_full   1.000
_diffrn_reflns_limit_h_min             -17
_diffrn_reflns_limit_h_max             17
_diffrn_reflns_limit_k_min             -17
_diffrn_reflns_limit_k_max             17
_diffrn_reflns_limit_l_min             -18
_diffrn_reflns_limit_l_max             19

#==============================================================================

# REFINEMENT DATA

_refine_special_details
;
    Refinement was performed using all reflections. The weighted 
    R-factor (wR) and goodness of fit (S) are based on F^2^.
    R-factor (gt) are based on F. The threshold expression of
    F^2^ > 2.0 sigma(F^2^) is used only for calculating R-factor (gt).
;
_reflns_number_total                   1752
_reflns_number_gt                      1559
_reflns_threshold_expression           F^2^>2.0\s(F^2^)
_refine_ls_structure_factor_coef       Fsqd
_refine_ls_R_factor_gt                 0.0375
_refine_ls_wR_factor_ref               0.1122
_refine_ls_hydrogen_treatment          refall
_refine_ls_number_reflns               1752
_refine_ls_number_parameters           106
_refine_ls_goodness_of_fit_ref         1.163
_refine_ls_weighting_scheme            calc
_refine_ls_weighting_details
   'w = 1/[\s^2^(Fo^2^)+(0.0606P)^2^+7.3850P] where P=(Fo^2^+2Fc^2^)/3'
_refine_ls_shift/su_max                0.0000
_refine_diff_density_max               2.10
_refine_diff_density_min               -0.80
_refine_ls_extinction_method           none
_refine_ls_extinction_coef             ?

loop_
_atom_type_symbol
_atom_type_description
_atom_type_scat_dispersion_real
_atom_type_scat_dispersion_imag
_atom_type_scat_source
  'C' 'C'  0.003 0.002 
;
International Tables for Crystallography
(1992, Vol. C, Tables 4.2.6.8 and 6.1.1.4)
;
  'H' 'H'  0.000 0.000 
;
International Tables for Crystallography
(1992, Vol. C, Table 6.1.1.4)
;
  'Cu' 'Cu'  0.320 1.265 
;
International Tables for Crystallography
(1992, Vol. C, Tables 4.2.6.8 and 6.1.1.4)
;
  'N' 'N'  0.006 0.003 
;
International Tables for Crystallography
(1992, Vol. C, Tables 4.2.6.8 and 6.1.1.4)
;
  'Nd' 'Nd'  -0.194 3.018 
;
International Tables for Crystallography
(1992, Vol. C, Tables 4.2.6.8 and 6.1.1.4)
;
  'O' 'O'  0.011 0.006 
;
International Tables for Crystallography
(1992, Vol. C, Tables 4.2.6.8 and 6.1.1.4)
;

#==============================================================================

# ATOMIC COORDINATES AND THERMAL PARAMETERS

loop_
_atom_site_label
_atom_site_type_symbol
_atom_site_fract_x
_atom_site_fract_y
_atom_site_fract_z
_atom_site_U_iso_or_equiv
_atom_site_adp_type
_atom_site_occupancy
_atom_site_symmetry_multiplicity
_atom_site_calc_flag
_atom_site_refinement_flags
_atom_site_disorder_assembly
_atom_site_disorder_group
 Nd(1) Nd 0.6667 0.3333 0.33178(2) 0.01464(15) Uani 1.00 3 d S . .
 Cu(2) Cu 0.5000 0.0000 0.5000 0.0208(2) Uani 1.00 2 d S . .
 O(1) O 0.5489(2) 0.1855(2) 0.4435(2) 0.0335(7) Uani 1.00 1 d . . .
 O(2) O 0.4409(3) 0.2427(3) 0.3750(2) 0.0342(7) Uani 1.00 1 d . . .
 O(3) O 0.5975(3) 0.0731(2) 0.6064(2) 0.0354(7) Uani 1.00 1 d . . .
 O(4) O 0.6147(3) 0.1796(3) 0.7262(2) 0.0405(8) Uani 1.00 1 d . . .
 O(5) O 0.2802(9) 0.0000 0.2500 0.162(5) Uani 1.00 2 d S . .
 O(6) O 0.173(2) 0.1621(13) 0.3352(10) 0.46(2) Uani 1.00 1 d . . .
 N(1) N 0.3899(3) 0.0409(2) 0.5581(2) 0.0250(7) Uani 1.00 1 d . . .
 C(1) C 0.4538(3) 0.1821(3) 0.4325(2) 0.0250(8) Uani 1.00 1 d . . .
 C(2) C 0.3526(3) 0.0974(3) 0.4904(3) 0.0304(9) Uani 1.00 1 d . . .
 C(3) C 0.4471(4) 0.1135(4) 0.6383(3) 0.0355(10) Uani 1.00 1 d . . .
 C(4) C 0.5617(3) 0.1232(4) 0.6585(2) 0.0236(8) Uani 1.00 1 d . . .
 H(1) H 0.3272 -0.0249 0.5772 0.030 Uiso 1.00 1 c R . .
 H(2) H 0.3197 0.1376 0.5218 0.037 Uiso 1.00 1 c R . .
 H(3) H 0.2939 0.0397 0.4515 0.037 Uiso 1.00 1 c R . .
 H(4) H 0.3975 0.0813 0.6909 0.043 Uiso 1.00 1 c R . .
 H(5) H 0.4582 0.1896 0.6279 0.043 Uiso 1.00 1 c R . .


loop_
_atom_site_aniso_label
_atom_site_aniso_U_11
_atom_site_aniso_U_22
_atom_site_aniso_U_33
_atom_site_aniso_U_12
_atom_site_aniso_U_13
_atom_site_aniso_U_23
 Nd(1) 0.01660(18) 0.01660(18) 0.0107(2) 0.00830(9) 0.0000 0.0000
 Cu(2) 0.0265(3) 0.0194(3) 0.0185(3) 0.0129(2) -0.0050(2) -0.0072(2)
 O(1) 0.0264(16) 0.0343(17) 0.0403(17) 0.0155(14) 0.0091(13) 0.0114(14)
 O(2) 0.0367(19) 0.0379(17) 0.0289(16) 0.0192(15) 0.0019(14) 0.0063(14)
 O(3) 0.0425(19) 0.0375(18) 0.0316(15) 0.0238(15) -0.0088(14) -0.0126(13)
 O(4) 0.049(2) 0.041(2) 0.0294(16) 0.0213(18) -0.0110(15) -0.0194(15)
 O(5) 0.143(6) 0.262(17) 0.121(8) 0.131(8) -0.020(5) -0.039(10)
 O(6) 0.63(3) 0.152(13) 0.211(15) -0.107(18) -0.16(2) 0.010(11)
 N(1) 0.0254(17) 0.0197(16) 0.0242(15) 0.0069(14) 0.0019(13) -0.0006(13)
 C(1) 0.027(2) 0.0193(18) 0.0275(19) 0.0110(16) 0.0016(16) -0.0023(15)
 C(2) 0.025(2) 0.033(2) 0.034(2) 0.0155(19) 0.0051(17) 0.0039(18)
 C(3) 0.037(2) 0.044(2) 0.025(2) 0.019(2) 0.0004(18) -0.0075(19)
 C(4) 0.028(2) 0.022(2) 0.0190(19) 0.0108(16) -0.0012(14) -0.0044(16)

#==============================================================================

_computing_data_collection            'CrystalClear'
_computing_cell_refinement            'CrystalClear'
_computing_data_reduction             'CrystalStructure'
_computing_structure_solution         'SIR92'
_computing_structure_refinement       'SHELXL'
_computing_publication_material       'CrystalStructure 3.8'
_computing_molecular_graphics          ?

#==============================================================================

# MOLECULAR GEOMETRY

_geom_special_details
;
    ENTER SPECIAL DETAILS OF THE MOLECULAR GEOMETRY
;

loop_
_geom_bond_atom_site_label_1
_geom_bond_atom_site_label_2
_geom_bond_distance
_geom_bond_publ_flag
_geom_bond_site_symmetry_1
_geom_bond_site_symmetry_2
Nd(1) O(1) 2.452(2) yes . .
Nd(1) O(1) 2.452(3) yes . 2_655
Nd(1) O(1) 2.453(3) yes . 3_665
Nd(1) O(2) 2.723(3) yes . .
Nd(1) O(2) 2.722(5) yes . 2_655
Nd(1) O(2) 2.723(3) yes . 3_665
Nd(1) O(4) 2.394(3) yes . 4_654
Nd(1) O(4) 2.394(4) yes . 5_554
Nd(1) O(4) 2.393(4) yes . 6_664
Cu(2) O(3) 1.960(3) yes . .
Cu(2) O(3) 1.960(3) yes . 7_656
Cu(2) N(1) 2.010(4) yes . .
Cu(2) N(1) 2.010(4) yes . 7_656
O(1) C(1) 1.268(6) yes . .
O(2) C(1) 1.246(6) yes . .
O(3) C(4) 1.264(7) yes . .
O(4) C(4) 1.238(5) yes . .
N(1) C(2) 1.483(6) yes . .
N(1) C(3) 1.479(5) yes . .
C(1) C(2) 1.526(5) yes . .
C(3) C(4) 1.511(8) yes . .
N(1) H(1) 0.910 no . .
C(2) H(2) 0.970 no . .
C(2) H(3) 0.970 no . .
C(3) H(4) 0.970 no . .
C(3) H(5) 0.970 no . .

loop_
_geom_angle_atom_site_label_1
_geom_angle_atom_site_label_2
_geom_angle_atom_site_label_3
_geom_angle
_geom_angle_publ_flag
_geom_angle_site_symmetry_1
_geom_angle_site_symmetry_2
_geom_angle_site_symmetry_3
O(1) Nd(1) O(1) 80.08(10) yes . . 2_655
O(1) Nd(1) O(1) 80.06(11) yes . . 3_665
O(1) Nd(1) O(2) 49.98(13) yes . . .
O(1) Nd(1) O(2) 68.01(12) yes . . 2_655
O(1) Nd(1) O(2) 123.31(10) yes . . 3_665
O(1) Nd(1) O(4) 82.79(10) yes . . 4_654
O(1) Nd(1) O(4) 130.01(13) yes . . 5_554
O(1) Nd(1) O(4) 141.71(16) yes . . 6_664
O(1) Nd(1) O(1) 80.06(13) yes 2_655 . 3_665
O(1) Nd(1) O(2) 123.32(10) yes 2_655 . .
O(1) Nd(1) O(2) 50.00(11) yes 2_655 . 2_655
O(1) Nd(1) O(2) 68.00(12) yes 2_655 . 3_665
O(1) Nd(1) O(4) 130.07(16) yes 2_655 . 4_654
O(1) Nd(1) O(4) 141.66(10) yes 2_655 . 5_554
O(1) Nd(1) O(4) 82.80(12) yes 2_655 . 6_664
O(1) Nd(1) O(2) 67.98(10) yes 3_665 . .
O(1) Nd(1) O(2) 123.33(11) yes 3_665 . 2_655
O(1) Nd(1) O(2) 49.98(10) yes 3_665 . 3_665
O(1) Nd(1) O(4) 141.65(14) yes 3_665 . 4_654
O(1) Nd(1) O(4) 82.76(13) yes 3_665 . 5_554
O(1) Nd(1) O(4) 130.03(11) yes 3_665 . 6_664
O(2) Nd(1) O(2) 114.75(11) yes . . 2_655
O(2) Nd(1) O(2) 114.71(13) yes . . 3_665
O(2) Nd(1) O(4) 74.69(13) yes . . 4_654
O(2) Nd(1) O(4) 80.05(13) yes . . 5_554
O(2) Nd(1) O(4) 152.83(11) yes . . 6_664
O(2) Nd(1) O(2) 114.75(12) yes 2_655 . 3_665
O(2) Nd(1) O(4) 80.09(14) yes 2_655 . 4_654
O(2) Nd(1) O(4) 152.85(13) yes 2_655 . 5_554
O(2) Nd(1) O(4) 74.72(14) yes 2_655 . 6_664
O(2) Nd(1) O(4) 152.83(11) yes 3_665 . 4_654
O(2) Nd(1) O(4) 74.68(12) yes 3_665 . 5_554
O(2) Nd(1) O(4) 80.07(12) yes 3_665 . 6_664
O(4) Nd(1) O(4) 82.51(14) yes 4_654 . 5_554
O(4) Nd(1) O(4) 82.53(12) yes 4_654 . 6_664
O(4) Nd(1) O(4) 82.51(15) yes 5_554 . 6_664
O(3) Cu(2) O(3) 180.0(2) yes . . 7_656
O(3) Cu(2) N(1) 85.63(16) yes . . .
O(3) Cu(2) N(1) 94.37(16) yes . . 7_656
O(3) Cu(2) N(1) 94.37(16) yes 7_656 . .
O(3) Cu(2) N(1) 85.63(16) yes 7_656 . 7_656
N(1) Cu(2) N(1) 180.00(18) yes . . 7_656
Nd(1) O(1) C(1) 100.1(2) yes . . .
Nd(1) O(2) C(1) 87.8(3) yes . . .
Cu(2) O(3) C(4) 114.4(3) yes . . .
Nd(1) O(4) C(4) 151.7(4) yes 4_655 . .
Cu(2) N(1) C(2) 109.9(2) yes . . .
Cu(2) N(1) C(3) 108.0(3) yes . . .
C(2) N(1) C(3) 113.2(4) yes . . .
O(1) C(1) O(2) 122.1(3) yes . . .
O(1) C(1) C(2) 117.6(4) yes . . .
O(2) C(1) C(2) 120.2(4) yes . . .
N(1) C(2) C(1) 110.7(4) yes . . .
N(1) C(3) C(4) 112.7(4) yes . . .
O(3) C(4) O(4) 123.9(5) yes . . .
O(3) C(4) C(3) 118.6(3) yes . . .
O(4) C(4) C(3) 117.5(5) yes . . .
Cu(2) N(1) H(1) 108.6 no . . .
C(2) N(1) H(1) 108.6 no . . .
C(3) N(1) H(1) 108.6 no . . .
N(1) C(2) H(2) 109.5 no . . .
N(1) C(2) H(3) 109.5 no . . .
C(1) C(2) H(2) 109.5 no . . .
C(1) C(2) H(3) 109.5 no . . .
H(2) C(2) H(3) 108.1 no . . .
N(1) C(3) H(4) 109.1 no . . .
N(1) C(3) H(5) 109.1 no . . .
C(4) C(3) H(4) 109.1 no . . .
C(4) C(3) H(5) 109.1 no . . .
H(4) C(3) H(5) 107.8 no . . .

loop_
_geom_torsion_atom_site_label_1
_geom_torsion_atom_site_label_2
_geom_torsion_atom_site_label_3
_geom_torsion_atom_site_label_4
_geom_torsion
_geom_torsion_publ_flag
_geom_torsion_site_symmetry_1
_geom_torsion_site_symmetry_2
_geom_torsion_site_symmetry_3
_geom_torsion_site_symmetry_4
O(1) Nd(1) O(1) C(1) 68.8(2) ? . . 2_655 2_655
O(1) Nd(1) O(1) C(1) 150.3(2) ? 2_655 . . .
O(1) Nd(1) O(1) C(1) 150.3(3) ? . . 3_665 3_665
O(1) Nd(1) O(1) C(1) 68.8(2) ? 3_665 . . .
O(1) Nd(1) O(2) C(1) 0.8(2) ? . . . .
O(2) Nd(1) O(1) C(1) -0.8(2) ? . . . .
O(1) Nd(1) O(2) C(1) -94.8(2) ? . . 2_655 2_655
O(2) Nd(1) O(1) C(1) -159.0(2) ? 2_655 . . .
O(1) Nd(1) O(2) C(1) -34.0(3) ? . . 3_665 3_665
O(2) Nd(1) O(1) C(1) 95.1(2) ? 3_665 . . .
O(1) Nd(1) O(4) C(4) -136.4(9) ? . . 4_654 4_654
O(4) Nd(1) O(1) C(1) -76.8(2) ? 4_654 . . .
O(1) Nd(1) O(4) C(4) -65.9(8) ? . . 5_554 5_554
O(4) Nd(1) O(1) C(1) -2.9(3) ? 5_554 . . .
O(1) Nd(1) O(4) C(4) 159.8(5) ? . . 6_664 6_664
O(4) Nd(1) O(1) C(1) -145.0(2) ? 6_664 . . .
O(1) Nd(1) O(1) C(1) 68.8(3) ? 2_655 . 3_665 3_665
O(1) Nd(1) O(1) C(1) 150.3(2) ? 3_665 . 2_655 2_655
O(1) Nd(1) O(2) C(1) -34.0(3) ? 2_655 . . .
O(2) Nd(1) O(1) C(1) 95.1(2) ? . . 2_655 2_655
O(1) Nd(1) O(2) C(1) 0.8(2) ? 2_655 . 2_655 2_655
O(2) Nd(1) O(1) C(1) -0.8(2) ? 2_655 . 2_655 2_655
O(1) Nd(1) O(2) C(1) -94.7(3) ? 2_655 . 3_665 3_665
O(2) Nd(1) O(1) C(1) -159.0(2) ? 3_665 . 2_655 2_655
O(1) Nd(1) O(4) C(4) -65.8(8) ? 2_655 . 4_654 4_654
O(4) Nd(1) O(1) C(1) -2.9(3) ? 4_654 . 2_655 2_655
O(1) Nd(1) O(4) C(4) 159.8(6) ? 2_655 . 5_554 5_554
O(4) Nd(1) O(1) C(1) -145.0(2) ? 5_554 . 2_655 2_655
O(1) Nd(1) O(4) C(4) -136.4(6) ? 2_655 . 6_664 6_664
O(4) Nd(1) O(1) C(1) -76.8(2) ? 6_664 . 2_655 2_655
O(1) Nd(1) O(2) C(1) -94.8(2) ? 3_665 . . .
O(2) Nd(1) O(1) C(1) -159.0(3) ? . . 3_665 3_665
O(1) Nd(1) O(2) C(1) -34.0(2) ? 3_665 . 2_655 2_655
O(2) Nd(1) O(1) C(1) 95.1(3) ? 2_655 . 3_665 3_665
O(1) Nd(1) O(2) C(1) 0.8(2) ? 3_665 . 3_665 3_665
O(2) Nd(1) O(1) C(1) -0.8(2) ? 3_665 . 3_665 3_665
O(1) Nd(1) O(4) C(4) 159.8(8) ? 3_665 . 4_654 4_654
O(4) Nd(1) O(1) C(1) -145.0(3) ? 4_654 . 3_665 3_665
O(1) Nd(1) O(4) C(4) -136.4(7) ? 3_665 . 5_554 5_554
O(4) Nd(1) O(1) C(1) -76.8(3) ? 5_554 . 3_665 3_665
O(1) Nd(1) O(4) C(4) -65.8(6) ? 3_665 . 6_664 6_664
O(4) Nd(1) O(1) C(1) -3.0(3) ? 6_664 . 3_665 3_665
O(2) Nd(1) O(2) C(1) -113.0(2) ? . . 2_655 2_655
O(2) Nd(1) O(2) C(1) 23.0(2) ? 2_655 . . .
O(2) Nd(1) O(2) C(1) 23.0(3) ? . . 3_665 3_665
O(2) Nd(1) O(2) C(1) -113.0(2) ? 3_665 . . .
O(2) Nd(1) O(4) C(4) 173.2(9) ? . . 4_654 4_654
O(4) Nd(1) O(2) C(1) 94.2(2) ? 4_654 . . .
O(2) Nd(1) O(4) C(4) -67.6(7) ? . . 5_554 5_554
O(4) Nd(1) O(2) C(1) 179.1(2) ? 5_554 . . .
O(2) Nd(1) O(4) C(4) 58.5(7) ? . . 6_664 6_664
O(4) Nd(1) O(2) C(1) 128.2(3) ? 6_664 . . .
O(2) Nd(1) O(2) C(1) -113.0(3) ? 2_655 . 3_665 3_665
O(2) Nd(1) O(2) C(1) 23.0(2) ? 3_665 . 2_655 2_655
O(2) Nd(1) O(4) C(4) -67.5(8) ? 2_655 . 4_654 4_654
O(4) Nd(1) O(2) C(1) 179.1(2) ? 4_654 . 2_655 2_655
O(2) Nd(1) O(4) C(4) 58.5(8) ? 2_655 . 5_554 5_554
O(4) Nd(1) O(2) C(1) 128.2(2) ? 5_554 . 2_655 2_655
O(2) Nd(1) O(4) C(4) 173.2(6) ? 2_655 . 6_664 6_664
O(4) Nd(1) O(2) C(1) 94.2(2) ? 6_664 . 2_655 2_655
O(2) Nd(1) O(4) C(4) 58.7(10) ? 3_665 . 4_654 4_654
O(4) Nd(1) O(2) C(1) 128.1(3) ? 4_654 . 3_665 3_665
O(2) Nd(1) O(4) C(4) 173.2(7) ? 3_665 . 5_554 5_554
O(4) Nd(1) O(2) C(1) 94.2(3) ? 5_554 . 3_665 3_665
O(2) Nd(1) O(4) C(4) -67.5(6) ? 3_665 . 6_664 6_664
O(4) Nd(1) O(2) C(1) 179.1(3) ? 6_664 . 3_665 3_665
O(4) Nd(1) O(4) C(4) 8.1(7) ? 4_654 . 5_554 5_554
O(4) Nd(1) O(4) C(4) 91.5(8) ? 5_554 . 4_654 4_654
O(4) Nd(1) O(4) C(4) 91.5(6) ? 4_654 . 6_664 6_664
O(4) Nd(1) O(4) C(4) 8.2(8) ? 6_664 . 4_654 4_654
O(4) Nd(1) O(4) C(4) 8.1(6) ? 5_554 . 6_664 6_664
O(4) Nd(1) O(4) C(4) 91.5(7) ? 6_664 . 5_554 5_554
O(3) Cu(2) N(1) C(2) 131.1(2) ? . . . .
O(3) Cu(2) N(1) C(3) 7.2(2) ? . . . .
N(1) Cu(2) O(3) C(4) -7.0(3) ? . . . .
O(3) Cu(2) N(1) C(2) 48.9(2) ? . . 7_656 7_656
O(3) Cu(2) N(1) C(3) 172.8(2) ? . . 7_656 7_656
N(1) Cu(2) O(3) C(4) 173.0(3) ? 7_656 . . .
O(3) Cu(2) N(1) C(2) -48.9(2) ? 7_656 . . .
O(3) Cu(2) N(1) C(3) -172.8(2) ? 7_656 . . .
N(1) Cu(2) O(3) C(4) -173.0(3) ? . . 7_656 7_656
O(3) Cu(2) N(1) C(2) -131.1(2) ? 7_656 . 7_656 7_656
O(3) Cu(2) N(1) C(3) -7.2(2) ? 7_656 . 7_656 7_656
N(1) Cu(2) O(3) C(4) 7.0(3) ? 7_656 . 7_656 7_656
Nd(1) O(1) C(1) O(2) 1.5(4) ? . . . .
Nd(1) O(1) C(1) C(2) 179.5(3) ? . . . .
Nd(1) O(2) C(1) O(1) -1.3(4) ? . . . .
Nd(1) O(2) C(1) C(2) -179.3(3) ? . . . .
Cu(2) O(3) C(4) O(4) -175.8(3) ? . . . .
Cu(2) O(3) C(4) C(3) 4.8(5) ? . . . .
Nd(1) O(4) C(4) O(3) 149.3(5) ? 4_655 . . .
Nd(1) O(4) C(4) C(3) -31.4(8) ? 4_655 . . .
Cu(2) N(1) C(2) C(1) -41.6(3) ? . . . .
Cu(2) N(1) C(3) C(4) -6.6(4) ? . . . .
C(2) N(1) C(3) C(4) -128.5(4) ? . . . .
C(3) N(1) C(2) C(1) 79.2(4) ? . . . .
O(1) C(1) C(2) N(1) 5.8(5) ? . . . .
O(2) C(1) C(2) N(1) -176.1(4) ? . . . .
N(1) C(3) C(4) O(3) 1.5(5) ? . . . .
N(1) C(3) C(4) O(4) -177.9(3) ? . . . .

loop_
_geom_contact_atom_site_label_1
_geom_contact_atom_site_label_2
_geom_contact_distance
_geom_contact_publ_flag
_geom_contact_site_symmetry_1
_geom_contact_site_symmetry_2
O(2) O(5) 3.414(3) ? . .
O(2) O(6) 3.26(3) ? . .
O(2) N(1) 2.978(6) ? . 9_556
O(3) O(5) 3.123(9) ? . 4_655
O(4) O(2) 3.301(6) ? . 5_555
O(4) O(5) 3.374(10) ? . 4_655
O(5) O(2) 3.414(3) ? . .
O(5) O(2) 3.414(4) ? . 10_555
O(5) O(3) 3.123(8) ? . 4_654
O(5) O(3) 3.123(9) ? . 7_656
O(5) O(4) 3.374(10) ? . 4_654
O(5) O(4) 3.374(10) ? . 7_656
O(5) O(6) 3.40(3) ? . .
O(5) O(6) 3.40(2) ? . 10_555
O(5) C(1) 3.596(5) ? . .
O(5) C(1) 3.596(5) ? . 10_555
O(5) C(4) 3.551(10) ? . 4_654
O(5) C(4) 3.551(11) ? . 7_656
O(6) O(2) 3.26(3) ? . .
O(6) O(5) 3.40(3) ? . .
O(6) O(6) 2.52(2) ? . 12_555
O(6) N(1) 3.196(15) ? . 9_556
O(6) C(2) 3.395(16) ? . 9_556
O(6) C(3) 3.353(16) ? . 9_556
N(1) O(2) 2.978(4) ? . 8_556
N(1) O(6) 3.20(3) ? . 8_556
C(1) O(5) 3.596(5) ? . .
C(2) O(6) 3.40(2) ? . 8_556
C(3) O(6) 3.35(3) ? . 8_556
C(4) O(5) 3.551(11) ? . 4_655
O(2) H(1) 2.139 ? . 9_556
O(2) H(4) 3.404 ? . 9_556
O(5) H(3) 2.999 ? . .
O(5) H(3) 2.999 ? . 10_555
O(6) H(1) 2.656 ? . 9_556
O(6) H(2) 3.492 ? . .
O(6) H(2) 2.944 ? . 9_556
O(6) H(3) 3.314 ? . .
O(6) H(3) 3.498 ? . 9_556
O(6) H(4) 3.417 ? . 5_554
O(6) H(4) 2.791 ? . 9_556
O(6) H(5) 3.563 ? . 9_556
N(1) H(2) 3.424 ? . 8_556
C(1) H(1) 2.895 ? . 9_556
C(2) H(1) 3.252 ? . 9_556
C(2) H(2) 3.416 ? . 8_556
C(3) H(4) 3.414 ? . 10_556
H(1) O(2) 2.139 ? . 8_556
H(1) O(6) 2.656 ? . 8_556
H(1) C(1) 2.895 ? . 8_556
H(1) C(2) 3.252 ? . 8_556
H(1) H(2) 2.775 ? . 8_556
H(1) H(3) 3.568 ? . 8_556
H(1) H(4) 3.479 ? . 10_556
H(2) O(6) 3.492 ? . .
H(2) O(6) 2.944 ? . 8_556
H(2) N(1) 3.424 ? . 9_556
H(2) C(2) 3.416 ? . 9_556
H(2) H(1) 2.775 ? . 9_556
H(2) H(3) 2.685 ? . 9_556
H(3) O(5) 2.999 ? . .
H(3) O(6) 3.314 ? . .
H(3) O(6) 3.498 ? . 8_556
H(3) H(1) 3.568 ? . 9_556
H(3) H(2) 2.685 ? . 8_556
H(4) O(2) 3.036 ? . 5_555
H(4) O(2) 3.404 ? . 8_556
H(4) O(6) 3.417 ? . 5_555
H(4) O(6) 2.791 ? . 8_556
H(4) C(3) 3.414 ? . 10_556
H(4) H(1) 3.479 ? . 10_556
H(4) H(4) 2.570 ? . 10_556
H(5) O(6) 3.563 ? . 8_556


#==============================================================================

# Additional structures and associated data_? identifiers
# should be added at this point if there is more than one 
# structure analysis in the CIF.

#==============================================================================

#     End of CIF

#==============================================================================
